# Supplementary material for: Neutralisation of the interleukin-33/ST2 pathway ameliorates experimental colitis through enhancement of mucosal healing in mice
Source: PubMed Central journal article supplement — Gut. 2012 Nov 21;62(12):1714–23. doi: 10.1136/gutjnl-2011-301785 (PMC3841767; doi:10.1136/gutjnl-2011-301785), 2012-11-21
Supplement: gutjnl-2011-301785-s2.pdf [file gutjnl-2011-301785-s2.pdf]

**Supplementary Table 2 : Immunohistochemical evaluation of IL-33/ST2 staining on sections of macroscopically non-involved colon areas from IBD patients with active disease. (A)** Characteristics of patients with CD or UC. **(B)** Compiled immunohistochemistry results for IL-33 on sections from human colon. Data represent fraction of blocks that stained positive for IL-33 on the respective cell type.

**A)**

|                              |                   | <b>Non-involved colons of<br/>CD</b> | <b>Non-involved colons of<br/>UC</b> |
|------------------------------|-------------------|--------------------------------------|--------------------------------------|
| <b>Number of individuals</b> |                   | 7                                    | 5                                    |
| <b>Male:female</b>           |                   | 4:3                                  | 4 :1                                 |
| <b>Median age (range)</b>    |                   | 59 (43-74)                           | 43 (21-76)                           |
| <b>Number of blocks</b>      |                   | 12                                   | 7                                    |
| <b>Of which</b>              |                   |                                      |                                      |
|                              | <b>Biopsies</b>   | 6                                    | 5                                    |
|                              | <b>Resections</b> | 6                                    | 2                                    |

**B)**

|                                                            | <b>Non-involved colons of<br/>CD</b> | <b>Non-involved colons of<br/>UC</b> |
|------------------------------------------------------------|--------------------------------------|--------------------------------------|
| <b>Epithelium</b>                                          | 0/12                                 | 0/7                                  |
| <b>Inflammatory Infiltrate</b>                             | -                                    | -                                    |
| <b>Muscle cells, fibroblasts</b>                           | 1/12                                 | 0/7                                  |
| <b>Single myeloid/lymphoid<br/>cells in lamina propria</b> | 7/12                                 | 2/7                                  |
