# Supplementary material for: Neutralisation of the interleukin-33/ST2 pathway ameliorates experimental colitis through enhancement of mucosal healing in mice
Source: HighWire-hosted journal article supplement (doi:10.1136/gutjnl-2011-301785), 2012-11-21
Supplement: gutjnl-2011-301785supp_table1.pdf [file gutjnl-2011-301785supp_table1.pdf]

**Supplementary Table 1: Immunohistochemical evaluation of IL-33/ST2 staining on involved colon sections from IBD patients with active disease. (A)** Characteristics of patients with CD or UC or normal controls, **(B)** Compiled immunohistochemistry results for IL-33 and ST2 staining on sections from human colon. Data represent fraction of blocks that stained positive for the respective stain and cell type.

**A)**

|                              |                   | <b>Normal</b> | <b>CD</b>  | <b>UC</b>  |
|------------------------------|-------------------|---------------|------------|------------|
| <b>Number of individuals</b> |                   | 6             | 13         | 9          |
| <b>Male:female</b>           |                   | 3:3           | 4:9        | 6:3        |
| <b>Median age (range)</b>    |                   | 43 (27-76)    | 48 (28-74) | 43 (21-64) |
| <b>Number of blocks</b>      |                   | 6             | 18         | 12         |
| <b>Of which</b>              |                   |               |            |            |
|                              | <b>Biopsies</b>   | 2             | 2          | 3          |
|                              | <b>Resections</b> | 4             | 16         | 9          |

B)

|                                  |               |           |           |
|----------------------------------|---------------|-----------|-----------|
| <b>IL-33</b>                     |               |           |           |
|                                  | <b>Normal</b> | <b>CD</b> | <b>UC</b> |
| <b>Epithelium</b>                | 0/6           | 2/18      | 9/12      |
| <b>Inflammatory Infiltrate</b>   | -             | 11/18     | 9/12      |
| <b>Muscle cells, fibroblasts</b> | 1/6           | 10/18     | 9/12      |
| <b>ST2</b>                       |               |           |           |
| <b>Epithelium</b>                | 6/6           | 15/18     | 11/12     |
| <b>Inflammatory Infiltrate</b>   | -             | 10/18     | 8/12      |
| <b>Muscle cells, fibroblasts</b> | 0/6           | 1/18      | 0/12      |
