# Supplementary material for: Neutralisation of the interleukin-33/ST2 pathway ameliorates experimental colitis through enhancement of mucosal healing in mice
Source: HighWire-hosted journal article supplement (doi:10.1136/gutjnl-2011-301785), 2012-11-21
Supplement: gutjnl-2011-301785supp_table3.pdf [file gutjnl-2011-301785supp_table3.pdf]

**Supplementary Table 3: Clinical characteristics of UC patients in remission.**

| <b>Patient</b> | <b>Gender</b> | <b>Age (years)</b> | <b>Duration of disease (years)</b> | <b>Extension of disease</b> | <b>Medication</b> |
|----------------|---------------|--------------------|------------------------------------|-----------------------------|-------------------|
| #1             | F             | 41                 | 10                                 | pancolitis                  | no treatment      |
| #2             | F             | 30                 | 4                                  | pancolitis                  | 5-ASA             |
| #3             | F             | 67                 | 16                                 | left-sided colitis          | steroids          |
| #4             | M             | 39                 | 4                                  | proctitis                   | steroids ; 5-ASA  |
| #5             | F             | 46                 | 10                                 | left-sided colitis          | 5-ASA             |
